# Supplementary material for: Snow-vegetation-atmosphere interactions in alpine tundra
Source: Copernicus journal article supplement (doi:10.5194/bg-2023-21), 2023-02-06
Supplement: Supplementary file 1 [file bg-2023-21-supplement.pdf]

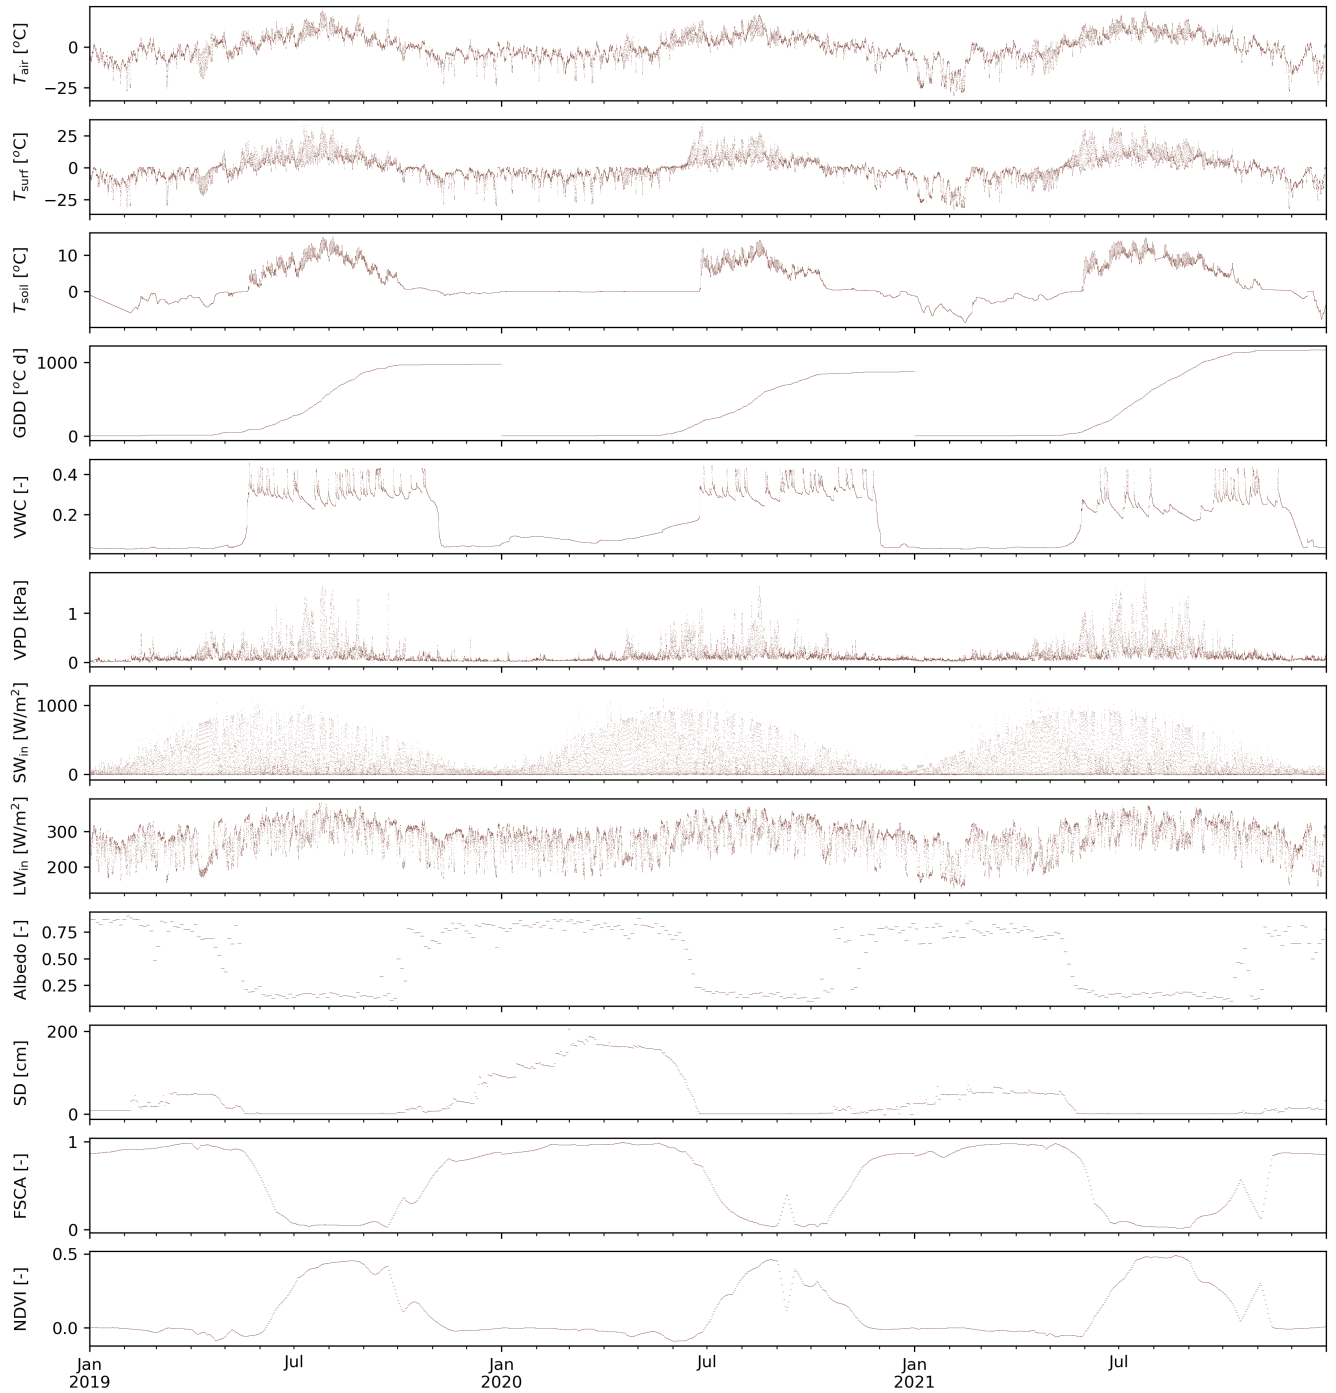

**Figure S1.** Time series of 30-minute estimates for the 12 predictors. Variable name denotes, from top to bottom, air temperature ( $T_{\text{air}}$  [°C]), surface temperature ( $T_{\text{surf}}$  [°C]), soil temperature ( $T_{\text{soil}}$  [°C]), growing degree days (GDD [°C d]), soil volumetric water content (VWC [-]), vapour pressure deficit (VPD [kPa]), incoming shortwave radiation ( $SW_{\text{in}}$  [ $\text{W m}^{-2}$ ]), incoming longwave radiation ( $LW_{\text{in}}$  [ $\text{W m}^{-2}$ ]), surface albedo (albedo [-]), snow depth (SD [cm]), fractional snow-covered area (FSCA [-]), normalised difference vegetation index (NDVI [-])

**Table S1.** Fractions of weighted contributions from different nature types for both footprints separately as well as combined. Statistics represent averages over all valid CO<sub>2</sub> flux measurements from 2019-2021.

|                     | Combined | East | West |
|---------------------|----------|------|------|
| Water               | 0.25     | 0.32 | 0.20 |
| Other               | 0.02     | 0.00 | 0.04 |
| Mountain heathlands | 0.11     | 0.08 | 0.14 |
| Lichen heathlands   | 0.18     | 0.18 | 0.18 |
| Moderate snow beds  | 0.21     | 0.13 | 0.26 |
| Late snow beds      | 0.09     | 0.19 | 0.01 |
| Flood plains        | 0.03     | 0.03 | 0.03 |
| Fens                | 0.11     | 0.07 | 0.14 |

**Table S2.** Mean evaluation statistics for 10 random forest regression models using different random subsets of data for training (80%) and testing (20%). Root mean square error (RMSE) values are given in the respective flux units, i.e.  $\mu\text{mol m}^{-2} \text{s}^{-1}$  for NEE and  $\text{mmol m}^{-2} \text{s}^{-1}$  for ET.

| Footprint |      | # of estimates | RMSE     |       |       | $R^2$    |       |       |
|-----------|------|----------------|----------|-------|-------|----------|-------|-------|
|           |      |                | Training | Test  | All   | Training | Test  | All   |
| NEE       | East | 10270          | 0.008    | 0.055 | 0.017 | 0.982    | 0.868 | 0.960 |
|           | West | 13806          | 0.014    | 0.098 | 0.031 | 0.992    | 0.945 | 0.983 |
| ET        | East | 10031          | 0.002    | 0.015 | 0.005 | 0.979    | 0.849 | 0.954 |
|           | West | 12677          | 0.005    | 0.039 | 0.012 | 0.985    | 0.886 | 0.965 |

**Table S3.** Growing season statistics based on gap-filled NEE and ET fluxes of both footprints for the three years with flux measurements.

|                                                                             | Year | Footprint West | Footprint East |
|-----------------------------------------------------------------------------|------|----------------|----------------|
| Start date                                                                  | 2019 | 25 June        | 18 June        |
|                                                                             | 2020 | 30 July        | 18 July        |
|                                                                             | 2021 | 25 June        | 20 June        |
| End date                                                                    | 2019 | 08 September   | 21 September   |
|                                                                             | 2020 | 26 September   | 19 September   |
|                                                                             | 2021 | 05 September   | 05 September   |
| Carbon balance [ $\text{gC m}^{-2}$ ]                                       | 2019 | 61.9           | 43.7           |
|                                                                             | 2020 | 28.4           | 16.6           |
|                                                                             | 2021 | 81.4           | 67.7           |
| ET loss [mm]                                                                | 2019 | 73.0           | 47.7           |
|                                                                             | 2020 | 34.4           | 20.9           |
|                                                                             | 2021 | 69.0           | 51.8           |
| Water use efficiency [ $\mu\text{mol-CO}_2 \text{ mmol-H}_2\text{O}^{-1}$ ] | 2019 | 1.27           | 1.37           |
|                                                                             | 2020 | 1.24           | 1.20           |
|                                                                             | 2021 | 1.77           | 1.96           |

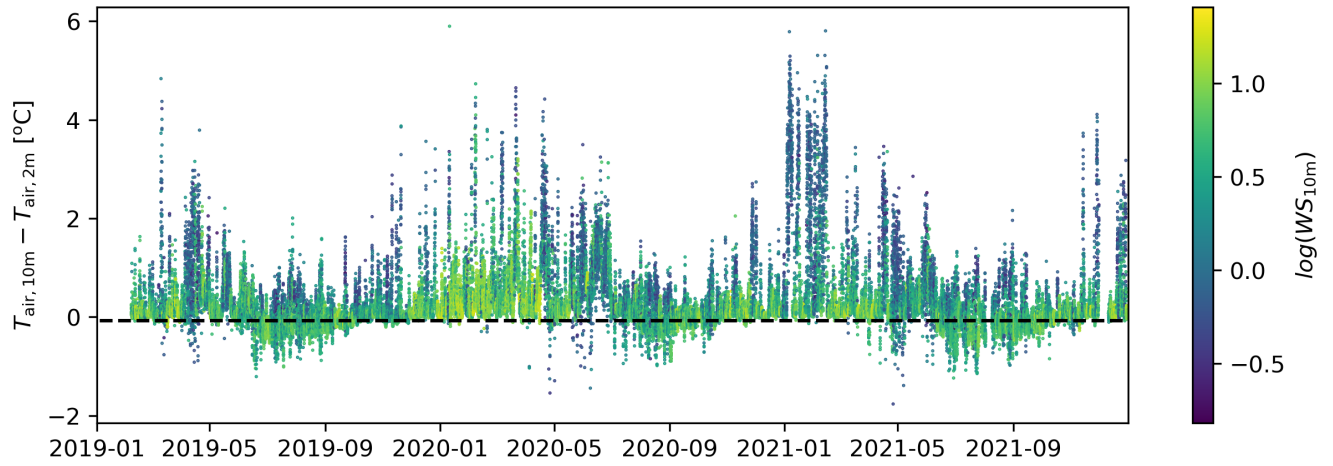

**Figure S2.** Time series of 30-minute estimates of air temperature differences between 10 and 2 m a.g.l. Colors indicate horizontal wind speeds at 10 m a.g.l. on a logarithmic scale. The stipulated line indicates neutral stratification.
